# Supplementary material
Source: publisher figshare collection journal article supplement (https://aacr.figshare.com/articles/dataset/_/22391342)
Supplement: Supplementary file 1 [file 39836870]

## Supplementary data – Materials and Methods

### Antibodies

BRCA1 was detected using the D9 antibody (Santa Cruz Biotech. Ltd Cat. No. sc-6954). p63 antibody was purchased from Abcam (clone 4A4 ab3239). Phosphorylated Serine 139 Histone H2AX antibody was purchased from Millipore (Cat. No. 05-636). For flow cytometry primary antibody staining was followed by staining with a fluorescently tagged secondary antibody (AlexaFluor goat anti-mouse 488 Cat no. A11017). Mouse monoclonal anti- $\beta$ -tubulin (Sigma Cat. No. T4026) and mouse monoclonal anti-GAPDH (Biogenesis Cat. No. 4699-9555) were used to demonstrate equal loading of protein. BRCA1 was immunoprecipitated with Ab-1 (Oncogene Cat. No. OP92). AP-2 $\gamma$  antibodies were purchased from Santa Cruz Biotech Ltd (Cat no. sc-12762 western blot and sc-81181 for CHIP). IgG1 and IgG2a isotype controls were purchased from Dako Cytomation (cat no X0931 and X0943, respectively).

### Primers

ChIP assays:

C40 chip-F2: 5'- ggA AgC TTg ACT ACC gTg gA-3';

C40 chip-R2: 5'- CAg gTT Agg CTT Tgg AAC gA-3'

RqPCR

|                  |    |                                        |
|------------------|----|----------------------------------------|
| $\Delta$ Np63    | F: | 5'- gAg TTC TgT TAT CTT CTT Ag-3'      |
|                  | R: | 5'- TgT TCT gCg CgT ggT CTg-3'         |
| TA p63           | F: | 5'- ATg TCC CAg AgC ACA CAg AC-3'      |
|                  | R: | 5'- CAC ATg ggg TCA CTC Agg TC -3'     |
| Pan p63          | F: | 5'- gAC Agg AAg gCg gAT gAA gAT Ag-3'  |
|                  | R: | 5'- ACA gCC Tgg ATA gCg gAT ACA C -3'  |
| GATA3            | F: | 5'- CAG ACC ACC ACA ACC ACA CTC T-3'   |
|                  | R: | 5'- ggA TgC CTT CCT TCT TCA TAg TCA-3' |
| SMA              | F: | 5'- CTg TTC CAg CCA TTC TTC AT -3'     |
|                  | R: | 5'- TCA TgA TgC TgT TgT Agg Tgg T -3'  |
| P-cadherin       | F: | 5'- gCg gAg ACA ggC TAT gAg TC -3'     |
|                  | R: | 5'- AgT CAA ACT gCC CAC ATT CC -3'     |
| $\beta$ -tubulin | F: | 5'- CgC AgA AgA ggA ggA ggA TT -3'     |
|                  | R: | 5'- gAg gAA Agg ggC AgT TgA gT -3'     |

|                  |    |                                          |
|------------------|----|------------------------------------------|
| Muc1             | F: | 5'- ACA ATT gAC TCT ggC CTT CC-3'        |
|                  | R: | 5'- CAg gTT ATA TCg AgA ggC TgC T-3'     |
| CXCL1            | F: | 5'- TCC gTg gCC ACT gAA CTg-3'           |
|                  | R: | 5'- gTg gCT ATg ACT TCg gTT Tg-3'        |
| CTPS1            | F: | 5'- ATC CCg Tgg TCg TAg AC-3'            |
|                  | R: | 5'- Tgg CCA ACA AAC TTC AA-3'            |
| ITAG $\alpha$ 6: | F: | 5'- TCg gCA Cag CAA CCT TgA A-3'         |
|                  | R: | 5'- TTg TgA gAC TCC TTT TCC AAT CC -3'   |
| ITAG $\beta$ 1   | F: | 5'- CAA gCA ggg CCA AAT TgT gg-3'        |
|                  | R: | 5'- CCT TTg CTA Cgg TTg gTT ACA TT-3'    |
| GAPDH            | F: | 5'- ggg AAg gTg AAg gTC ggA gT-3'        |
|                  | R: | 5'- TCC ACT TTA CCA gAg TTA AAA gCA g-3' |

### siRNA sequences

BRCA1 5'-GCGUGCAGCUGAGAGGCAU-3'

$\Delta$ Np63#1 5'-GGACAGCAGCAUUGAUCAA-3'

TAp63 5'-UCCUCAGUCCAGAGGUUU-3'

p63 $\gamma$  5'-CUCCAAAACAAUCUGACGU-3'

AP-2 $\gamma$  5'-CCAGUGGCAGAAUAUUUAA-3'

p53 5'- UGUUCCGAGAGCUGAAUGA-3'

p63 UTR siRNA (targeting p63 $\alpha$  and  $\beta$ ) was a kind gift from Professor Dennis McCance (Queen's University Belfast).
